# Supplementary material
Source: publisher site journal article supplement (https://www.dovepress.com/get_supplementary_file.php?f=420940.xlsx)
Supplement: Supplementary file 1 [file get_supplementary_file.php]

## Sheet: raw date
Study ID	prescription or non-prescription	Right or Left	age	Sex	operative record	date	UDVA decimal	UDVA log MAR	spectacle CDVA decimal	spectacle CDVA log MAR	YOUSOFT CDVA decimal	YOUSOFT CDVA log MAR	average keratometry	coneal astigmatism	maximum keratometry	thinnest pachymetry	[Anterior] (6mm)]Asymmetry	[Posterior] (6mm)] Asymmetry	Total 6mm HOAs	keratoconus severity classification	RGP lens CDVA decimal	RGP lens CDVA log MAR	observation period (months)	dry eye
1	prescription	R	37	m	ICR	2020-02-22 14:31:38	0.06	1.22185	1.2	-0.0791812	1.2	-0.0791812	45.5	-0.1	48.9	423	2.79	1.63	1.429	1			3
2	prescription	R	27	f	CXL	2020-03-28 13:02:17	0.06	1.22185	0.9	0.0457575	1	0	50.6	-4.9	57.1	411	3.56	1	1.948	2	1	0	19
3	prescription	R	27	m		2020-04-11 11:09:11	0.3	0.522879	1	0	1.2	-0.0791812	48.8	-2.4	56.3	490	5.89	1.26	3.678	2			2	+
4	prescription	L		m		2020-04-11 11:08:53	0.5	0.30103	1.2	-0.0791812	1.2	-0.0791812	47.7	-2	55.2	492	6.09	1.25	3.7	1			2	+
5	prescription	R	46	m		2020-04-15 09:33:04	0.07	1.1549	0.7	0.154902	1	0	49.5	-3.1	58.3	464	5.6	1.45	3.139	2			2
6	prescription	L	20	m	CXL	2020-05-09 09:57:22	0.09	1.04576	0.15	0.823909	0.5	0.30103	66.9	-4	91.4	308	8.85	2.19	7.002	4			12	+
7	prescription	L	26	m	CXL	2020-05-23 12:34:32	0.04	1.39794	0.5	0.30103	1	0	52	-6.6	64.5	442	8.42	2.36	4.159	2	0.8	0.09691	19
8	prescription	R	31	m		2020-07-03 08:56:17	0.03	1.52288	0.9	0.0457575	1.5	-0.176091	49	-5.8	58.6	437	7.45	2.37	4.884	2			14	+
9	prescription	R	45	m		2020-09-07 16:20:44	0.1	1	1.5	-0.176091	1.5	-0.176091	44.6	-0.4	48.5	447	1.66	0.76	1.023	1	1.2	-0.0791812	13
10	prescription	L		m		2020-09-07 16:20:23	0.09	1.04576	1.2	-0.0791812	1.5	-0.176091	47.7	-1.6	52.6	423	2.42	0.74	1.426	1	1.2	-0.0791812	13
11	prescription	L	59	f	IOL	2020-11-20 10:50:26	0.09	1.04576	0.2	0.69897	0.9	0.0457575	51.3	-3.6	58.3	478	5	1.23	3.156	2	1	0	8	+
12	prescription	R	24	m	CXL	2020-12-08 09:28:11	0.6	0.221849	1	0	1.5	-0.176091	49.1	-3.4	58	444	6.62	1.6	3.779	2			5
13	prescription	R	22	m	CXL	2020-12-09 09:35:54	0.04	1.39794	0.4	0.39794	0.6	0.221849	52.8	-2.7	65	451	11.56	2.2	7.714	2			4	+
14	prescription	L		m	CXL	2020-12-09 09:35:27	0.05	1.30103	0.6	0.221849	0.9	0.0457575	49.3	-5	59.2	462	9.29	1.8	5.663	2			4	+
15	prescription	R	23	m	CXL	2021-02-19 09:51:30	0.5	0.30103	0.8	0.09691	1.5	-0.176091	49	-4.6	62.8	441	6.66	1.06	4.2	2			5
16	prescription	L		m	CXL	2021-03-31 09:19:45	0.15	0.823909	0.6	0.221849	1.2	-0.0791812	42.8	-3.5	51.2	455	5.44	1.69	3.21	1			3
17	prescription	R	23	m	CXL+IOL	2021-08-18 10:22:26	1	0	1.5	-0.176091	1.5	-0.176091	46.5	-3	54.5	439	5.48	1.78	2.798	1			1
18	prescription	L		m	CXL+IOL	2021-08-18 10:22:06	0.9	0.0457575	1	0	1.5	-0.176091	47.8	-4.5	55.9	440	4.96	1.22	2.506	1			1
19	prescription	R	25	f		2021-02-01 17:05:50	0.01	2	0.01	2	0.8	0.09691	65.1	-4.8	71.9	289	3.64	1.05	4.358	4	1	0	2	+
20	prescription	R	29	m	CXL	2021-12-25 11:50:48	0.15	0.823909	0.6	0.221849	1.2	-0.0791812	46.9	-3	52.9	449	4.44	1.23	2.594	1	1.5	-0.176091	1
21	prescription	L	44	m		2021-11-10 15:20:29	0.06	1.22185	0.7	0.154902	1.2	-0.0791812	47.3	-4.7	52.3	451	3.31	1.5	1.957	1			1
22	prescription	L	46	m		2022-06-08 09:33:40	0.2	0.69897	0.6	0.221849	1	0	51.1	-4.9	58.6	365	5.61	1.63	2.9	2			1
23	prescription	R	30	m		2022-06-30 10:21:24	0.9	0.0457575	1.2	-0.0791812	1.2	-0.0791812	44.9	-2.5	49.3	465	2.78	0.98	1.066	1	1.2	-0.0791812	2
24	prescription	L	37	m		2020-07-01 14:11:44	0.01	2	0.7	0.154902	1	0	50.9	-0.5	56.4	407	5.09	1.35	3.523	2			9
25	prescription	R	27	m		2022-02-03 09:57:07	0.3	0.522879	0.7	0.154902	1	0	45.9	-1.6	53	533	5.33	1.2	3.142	1	1.2	-0.0791812	0
26	prescription	R	20	m		2022-05-07 11:36:52	0.1	1	0.7	0.154902	1	0	48.4	-3.3	52.2	449	2.07	0.98	1.224	2			0
27	prescription	R	28	m		2022-09-09 09:40:06	0.04	1.39794	1	0	1.5	-0.176091	45.8	-0.7	49	529	1.37	0.37	1.011	1			0
28	prescription	L	44	m		2020-09-05 09:04:16	0.15	0.823909	1	0	1.2	-0.0791812	44.1	-4.8	48.2	473	1.64	0.66	0.957	1			0
29	prescription	R	46	m		2021-04-30 15:16:00	0.05	1.30103	0.1	1	0.8	0.09691	52.9	-6.2	66.9	395	9.78	2.68	5.279	3			0
30	prescription	L		m		2021-04-30 15:15:39	0.8	0.09691	1	0	1.5	-0.176091	45.6	-3.8	53.3	472	4.91	1.83	2.721	1			0
31	prescription	R	22	m		2022-06-07 14:33:49	0.5	0.30103	0.5	0.30103	1	0	44.4	-2.1	50.7	490	2.55	0.32	2.07	1			0
32	prescription	L	27	m	CXL	2022-07-11 08:55:16	0.03	1.52288	0.06	1.22185	0.8	0.09691	53.7	-3.7	62	360	8.08	2.06	5.347	3	1.2	-0.0791812	1	+
33	prescription	R	31	m	CXL	2022-07-20 10:21:29	0.8	0.09691	0.8	0.09691	1	0	45.3	-1.5	52.7	447	4.85	1.34	2.901	1			0
34	prescription	R	63	f		2022-05-20 10:06:11	0.05	1.30103	1	0	1.2	-0.0791812	47.8	-1.1	50.1	404	1.18	0.88	0.803	1	0.7	0.154902	2	+
35	prescription	L		f		2022-05-20 10:05:51	0.04	1.39794	0.9	0.0457575	0.9	0.0457575	50.9	-1.3	57	412	4.71	1.03	2.832	2	0.9	0.0457575	2	+
36	non-prescription	R	39	m	CXL	2021-02-01 16:11:19	1.2	-0.0791812	1.2	-0.0791812	1.5	-0.176091	45.2	-2.3	53.1	458	6.03	2.03	2.939	1	1.2	-0.0791812
37	non-prescription	R	37	m		2021-06-02 11:27:04	0.8	0.09691	0.8	0.09691	1	0	50.4	-6.5	59.7	415	3.47	0.99	2.25	2	1.5	-0.176091
38	non-prescription	L				2021-06-02 11:26:46	0.9	0.0457575	1.2	-0.0791812	0.8	0.09691	44.9	-4.1	50.6	460	3.08	1.2	1.498	1	1.5	-0.176091
39	non-prescription	R	31	m	CXL+ICR	2020-11-09 09:22:56	0.4	0.39794	0.7	0.154902	0.9	0.0457575	50.5	-4.7	64.2	381	9.54	1.65	8.288	2
40	non-prescription	L	26	m		2020-04-20 11:16:26	0.01	2	0.05	1.30103	0.3	0.522879	58.3	-9.5	71.9	358	12.02	2.54	9.318	4
41	non-prescription	L	31	m		2020-10-07 13:52:45	0.5	0.30103	0.5	0.30103	0.5	0.30103	46	-1.9	54.4	487	3.23	0.88	2.34	1	1	0
42	non-prescription	R	27	f		2021-05-28 16:00:48	0.07	1.1549	0.8	0.09691	1	0	45.4	-2.8	47.9	467	1.71	0.74	1.099	1	0.9	0.0457575
43	non-prescription	L				2021-05-28 16:00:25	0.05	1.30103	1	0	1.2	-0.0791812	43.9	-0.3	47.8	480	1.58	0.69	1.024	1	1	0
44	non-prescription	R	19	m	CXL	2021-05-21 08:58:21	0.6	0.221849	0.8	0.09691	0.8	0.09691	43.2	-3.5	49.6	417	4.3	0.99	2.513	1
45	non-prescription	L			CXL	2021-05-21 08:58:00	0.7	0.154902	0.8	0.09691	1	0	44.8	-6.3	53	398	4.77	1.47	2.812	2
46	non-prescription	R	36	m		2020-09-09 10:09:02	0.15	0.823909	0.4	0.39794	0.6	0.221849	54	-5.8	64.4	419	5.29	1.41	2.996	3	1.2	-0.0791812
47	non-prescription	R	13	m	CXL	2021-05-06 14:44:30	0.02	1.69897	0.1	1	0.15	0.823909	66.6	-7.6	83.4	346	6.48	2.29	8.253	4
48	non-prescription	R	26	f		2021-02-06 11:47:27	0.3	0.522879	1	0	0.8	0.09691	47.8	-1	52.4	394	3.25	2.16	1.048	1	1	0
49	non-prescription	R	33	m		2021-06-09 15:07:52	0.06	1.22185	0.8	0.09691	1.2	-0.0791812	47.1	-4.1	52.8	446	4.45	1.59	2.592	1
50	non-prescription	L				2021-06-09 15:07:29	0.08	1.09691	1	0	1.2	-0.0791812	48.7	-4.1	54.9	452	4.33	1.53	2.477	2
51	non-prescription	R	32	m		2021-05-07 09:55:14	0.1	1	0.3	0.522879	0.5	0.30103	56	-7.4	67.7	360	8.11	0.4	5.695	4	1	0
52	non-prescription	L				2021-05-07 09:54:28	0.1	1	0.3	0.522879	0.5	0.30103	50.8	-6.9	66.5	414	8.83	0.48	4.379	2	0.9	0.0457575
53	non-prescription	R	29	m	CXL	2022-05-20 14:44:18	0.4	0.39794	0.6	0.221849	0.8	0.09691	48.4	-2.9	58	395	7.86	1.49	4.394	2	1.5	-0.176091
54	non-prescription	L			CXL	2022-05-20 14:44:00	0.08	1.09691	0.6	0.221849	0.9	0.0457575	49.5	-5.9	60.6	367	7.78	1.84	4.645	2	1.2	-0.0791812
55	non-prescription	L	46	m		2022-04-22 08:59:49	0.04	1.39794	1	0	1.2	-0.0791812	51.5	-2.9	58.3	410	4.63	2.03	2.378	2
